# Supplementary material for: Metabolomics for the diagnosis of bladder cancer: A systematic review
Source: PubMed Central journal article supplement — Asian J Urol. 2023 Sep 12;11(2):221–41. doi: 10.1016/j.ajur.2022.11.005 (PMC11053311; doi:10.1016/j.ajur.2022.11.005), 2023-09-12
Supplement: mmc1.pdf [file mmc1.pdf]

## Supplementary materials

### Appendix 1. Search strategy.

#### Medline (Ovid)

(Exp metabolomics or metabolom\*.mp or lipid\*.mp or exp Nucleotides or (nucleotide\*).mp or exp Amino Acids or (amino acid\*).mp or exp Mass Spectrometry or (mass adj2 spectrometry).mp or (mass adj2 spectroscopy).mp or (mass spectrum analysis).mp or exp Magnetic Resonance Spectroscopy or (magnetic resonance spectroscop\*).mp or (MR spectroscop\*).mp or (NMR spectroscop\*).mp or (nuclear magnetic resonance).mp) AND (exp Urinary Bladder Neoplasms or (Urinary Bladder Neoplasm\*).mp or (bladder adj2 neoplasm\*).mp or (bladder adj2 tumor\*).mp or (bladder adj2 tumour\*).mp or (bladder adj2 cancer\*).mp or (Urinary Bladder cancer\*).mp or (Urinary Bladder malignant tumor\*).mp) AND (randomized controlled trial.pt or controlled clinical trial.pt or randomized.ab or placebo.ab or randomly.ab or trial.ab or (clinical adj2 trial).mp or (randomi\*ed adj2 controlled adj2 trial).mp or exp double-blind method or Exp cohort studies or (cohort adj2 stud\*).mp or exp case-control studies or (case-control adj2 stud\*).mp or exp Cross-sectional studies or (cross-sectional adj2 stud\*).mp or (descriptive adj2 stud\*).mp or (observational adj2 stud\*).mp).

#### Central

(Exp metabolomics or metabolom\*.mp or lipid\*.mp or exp Nucleotides or (nucleotide\*).mp or exp Amino Acids or (amino acid\*).mp or exp Mass Spectrometry or (mass adj2 spectrometry).mp or (mass adj2 spectroscopy).mp or (mass spectrum analysis).mp or exp Magnetic Resonance Spectroscopy or (magnetic resonance spectroscop\*).mp or (MR spectroscop\*).mp or (NMR spectroscop\*).mp or (nuclear magnetic resonance).mp) AND (exp Urinary Bladder Neoplasms or (Urinary Bladder Neoplasm\*).mp or (bladder adj2 neoplasm\*).mp or (bladder adj2 tumor\*).mp or (bladder adj2 tumour\*).mp or (bladder adj2 cancer\*).mp or (Urinary Bladder cancer\*).mp or (Urinary Bladder malignant tumor\*).mp).

#### Embase

((('metabolomics'/exp or 'metabolom\*':ti,ab or 'lipid\*':ti,ab or 'nucleotide'/exp or 'nucleotide\*':ti,ab or 'amino acid'/exp or 'amino acid\*':ti,ab or 'mass spectrometry'/exp or 'mass next/2 spectrometry':ti,ab or 'mass next/2 spectroscopy':ti,ab or 'mass spectrum analysis':ti,ab or 'nuclear magnetic resonance spectroscopy'/exp or 'magnetic resonance spectroscop\*':ti,ab or 'MR spectroscop\*':ti,ab or 'NMR spectroscop\*':ti,ab or 'nuclear magnetic resonance':ti,ab) AND ('bladder tumor'/exp or 'Urinary Bladder Neoplasm\*':ti,ab or 'bladder next/2 neoplasm\*':ti,ab or 'bladder next/2 tumor\*':ti,ab or 'bladder next/2 tumour\*':ti,ab or 'bladder next/2 cancer\*':ti,ab or 'Urinary Bladder cancer\*':ti,ab or 'Urinary Bladder malignant tumor\*':ti,ab) AND ('randomized controlled trial'/exp or 'randomi\*ed NEXT/2 controlled NEXT/2 trial':ti,ab or 'clinical trial'/exp or 'clinical NEXT/2 trial':ti,ab or 'double blind procedure'/exp or 'cohort analysis'/exp or 'cohort\*':ti,ab or 'case control study'/exp or 'case-control next/2 stud\*':ti,ab or 'cross-sectional study'/exp or 'cross-sectional next/2 stud\*':ti,ab or 'descriptive next/2 stud\*':ti,ab or 'observational next/2 stud\*':ti,ab)) AND [embase]/lim.

**Supplementary Table 1. Metabolic profiling of lipid pathway in bladder cancer.**

| Study                         | Sample type      | Analytical platform  | Choline-containing compounds |                 |                       | Additional lipid compounds |              |    |          |              |           |
|-------------------------------|------------------|----------------------|------------------------------|-----------------|-----------------------|----------------------------|--------------|----|----------|--------------|-----------|
|                               |                  |                      | Choline                      | Phospho-choline | Glycerophosphocholine | Inositol                   | Acetoacetate | TG | Glycerol | Ethanolamine | Carnitine |
| Pasikanti et al., 2010 [22]   | Urine            | GC-TOFMS             |                              |                 |                       |                            |              |    | ↓        |              |           |
| Putluri et al., 2011 [24]     | Urine            | LC-MS                |                              |                 |                       |                            |              |    |          |              | ↑         |
| Huang et al., 2011 [25]       | Urine            | LC-MS                |                              |                 |                       |                            |              |    |          |              | ↓         |
| Cao et al., 2012 [27]         | Serum            | H-NMR                | ↓                            |                 |                       |                            | ↑            |    |          |              |           |
| Pasikanti et al., 2013 [29]   | Urine            | GC×GC-TOFMS          |                              |                 |                       |                            |              |    | ↓        |              |           |
| Tripathi et al., 2013 [35]    | Tissue           | HR-MAS-NMR<br>GC-MS  | ↑                            | ↑               | ↑                     | ↑                          |              | ↑  |          |              |           |
| Jin et al., 2014 [33]         | Urine            | HPLC-QTOFMS          |                              |                 |                       |                            |              |    |          |              | ↑         |
| Wittmann et al., 2014 [36]    | Urine            | UHPLC-MS/MS<br>GC-MS | ↑                            | ↑               |                       |                            |              |    |          | ↓            | ↑         |
| Loras et al., 2019 [45]       | Tissue and urine | H-NMR                | ↑ ↓                          | ↑ ↓             | ↑ ↓                   |                            |              |    |          |              |           |
| Luczykowski et al., 2021 [47] | Urine            | LC-MS                |                              | ↑               |                       |                            |              |    |          |              |           |
| Li et al., 2022 [49]          | Urine            | LC-MS                | ↑                            |                 |                       |                            |              |    |          |              |           |

TG, triglycerides; GC, gas chromatography; MS, mass spectrometry; TOFMS, time-of-flight MS; LC, liquid chromatography; NMR, nuclear magnetic resonance; H-NMR, proton NMR; HR-MAS-NMR, high resolution-magic angle spinning NMR; HPLC-QTOFMS, high-performance liquid chromatography-quadrupole time-of-flight MS; GC×GC-TOFMS, two-dimensional GC-TOFMS; UHPLC-MS/MS, ultra-high performance liquid chromatography/tandem MS. ↓, down-regulated; ↑, up-regulated; ↓↑, undetermined trend.

Supplementary Table 2. Metabolic profiling of aldehyde pathway in bladder cancer.

| Study                   | Sample type | Analytical platform | Methanal | Ethanal | Propanal | Butanal | Pentanal | Hexanal | Heptanal | Nonenal | Dodecanal |
|-------------------------|-------------|---------------------|----------|---------|----------|---------|----------|---------|----------|---------|-----------|
| Jobu et al., 2012 [32]  | Urine       | GC-MS               |          |         |          |         |          |         |          | ↑       | ↑         |
| Wei et al., 2019 [44]   | Blood       | HS-GC-MS            | ↑        | ↑       | ↑        | ↑       | ↑        | ↑       | ↑        |         |           |
| Pinto et al., 2021 [48] | Urine       | HS-SPME-GC-MS       | ↓        |         |          |         |          | ↓       |          |         |           |

MS, mass spectrometry; GC, gas chromatography; HS-GC-MS, chromatography-MS coupled with a headspace generator sampler; HS-SPME-GC-MS, headspace solid-phase microextraction GC MS. ↓, down-regulated; ↑, up-regulated; ↓↑, undetermined trend.
